# Supplementary material
Source: HighWire-hosted journal article supplement (https://genome.cshlp.org/content/suppl/2003/09/10/13.10.2252)

### Supplementary Figure S1

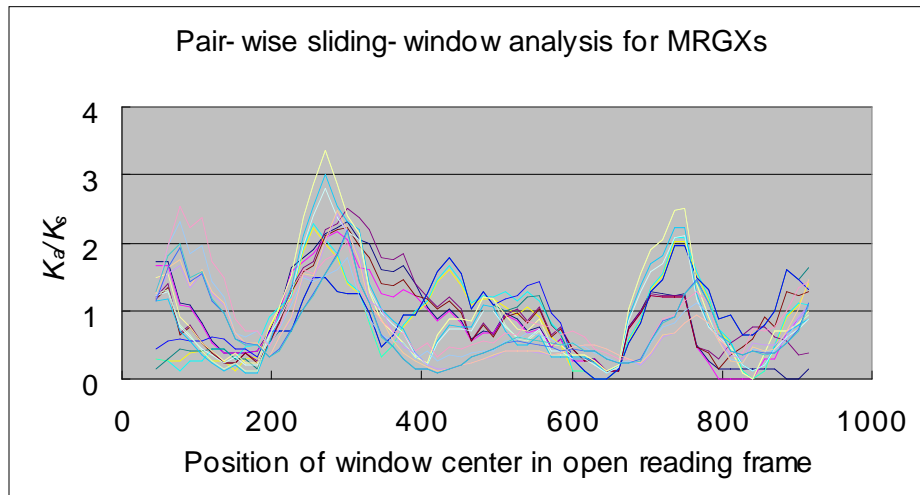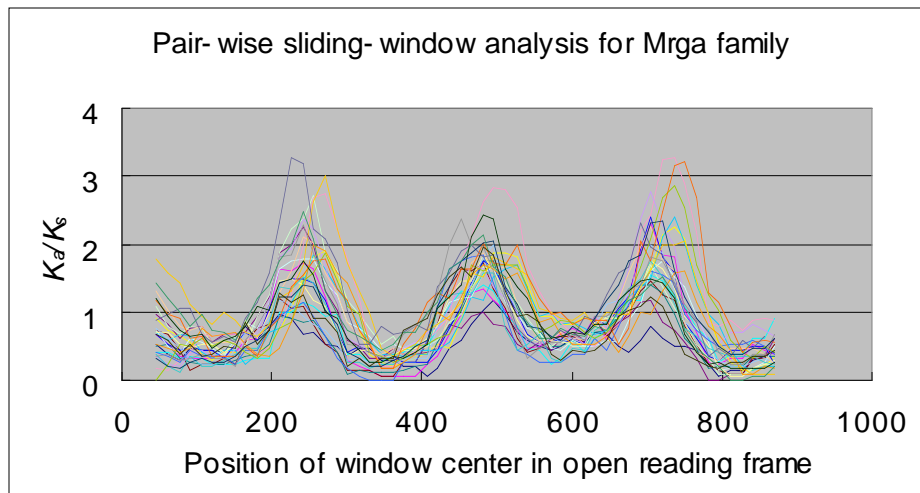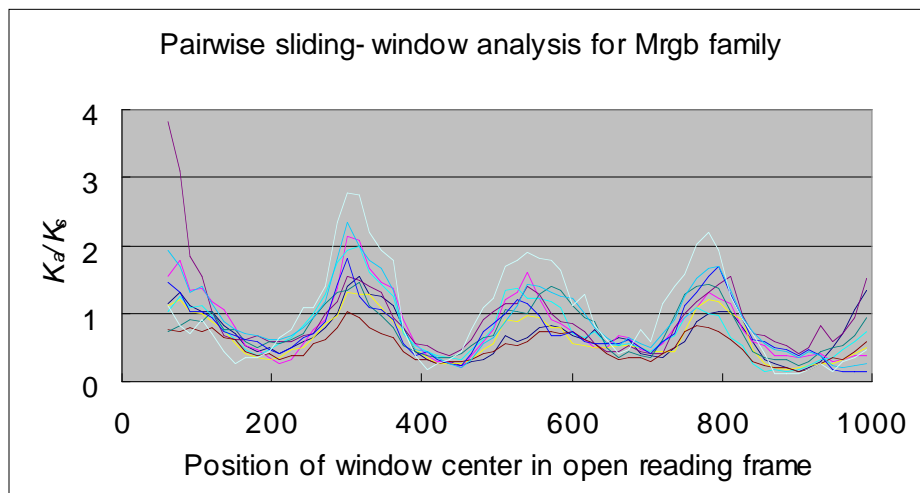

Supplement: Choi-14316_supp_fig.pdf [file Choi-14316_supp_fig.pdf]
